# Supplementary material
Source: publisher figshare collection journal article supplement (https://gsajournals.figshare.com/articles/dataset/_/14038109)
Supplement: Supplementary file 1 [file 1]

**A**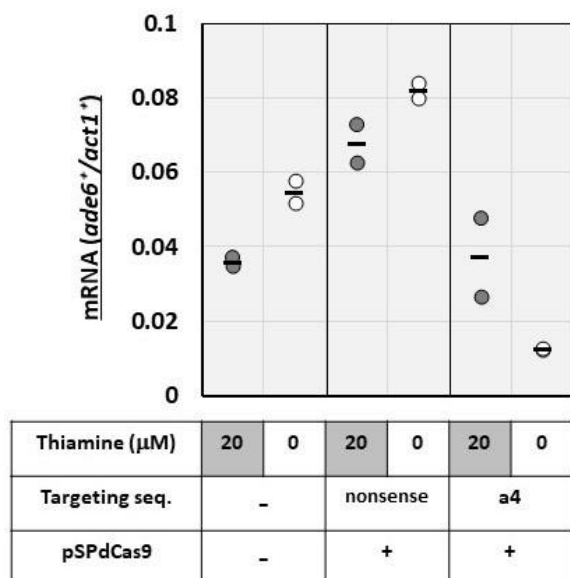**B**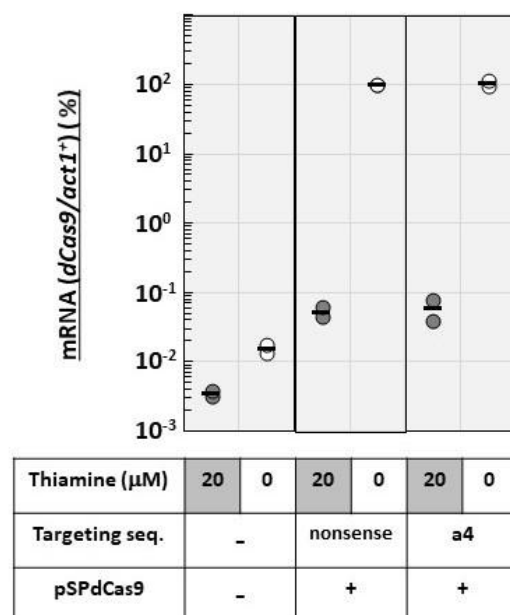

**Figure S1. mRNA levels of the *dCas9* gene in the presence or absence of thiamine with parallel assessment of *ade6*<sup>+</sup> mRNA levels.**

Fission yeast strains carrying indicated plasmids were grown with or without 20 μM thiamine. Results of parallel assessments of *ade6*<sup>+</sup> and *dCas9* mRNA levels by RT-qPCR are shown. (A) mRNA levels of the *ade6*<sup>+</sup> gene. (B) mRNA levels of the *dCas9* gene. Values relative to the mean of the *dCas9* mRNA level measured on the nonsense control without thiamine are shown as percentages. The chart is in logarithm scale. (A, B) circles indicate measured values from two biological replicates. Black lines indicate means of the two biological replicates. A wild-type fission yeast strain 972 (*h*<sup>-</sup>) was used for the no-plasmid control. These data are independent of those shown in the other figures.

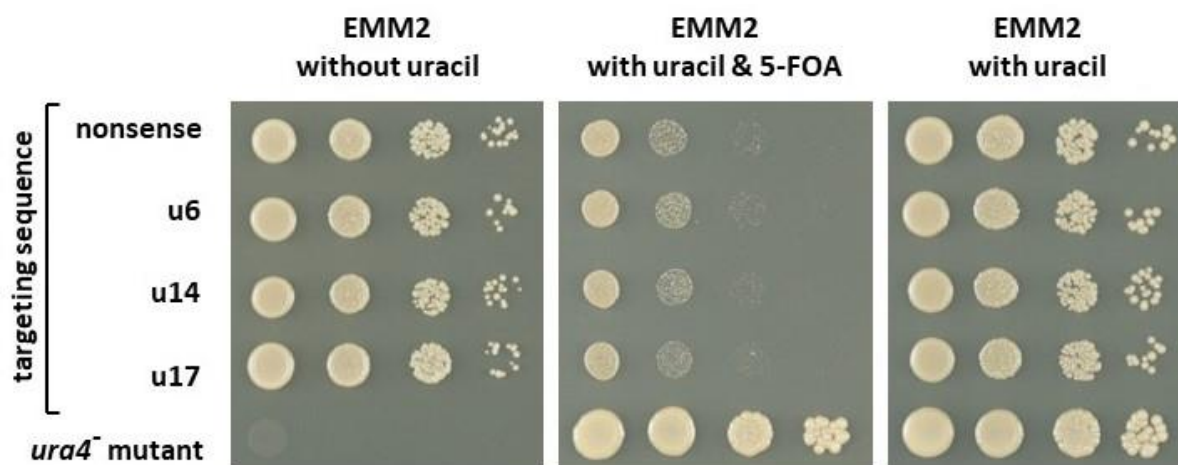

**Figure S2. Phenotype tests of fission yeast cells subjected to *ura4<sup>+</sup>* gene repression by dCas9-mediated CRISPRi.**

Serial dilution (10-fold) spot test growth assays of fission yeast cells bearing pSPdCas9 plasmids with the indicated targeting sequences on differentially supplemented media as shown. The *ura4<sup>-</sup>* mutant (strain sp168, *h<sup>-</sup> ura4<sup>-</sup>*) is defective in uracil biogenesis. Cells were spotted after induction of dCas9-mediated CRISPRi (see the Materials and Methods section for details).

**A**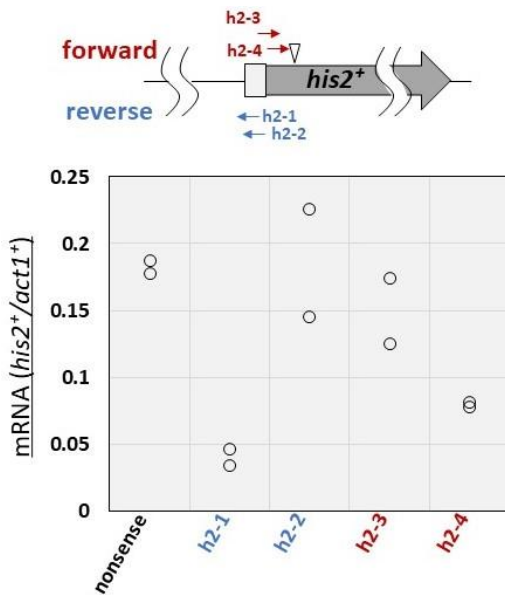**B**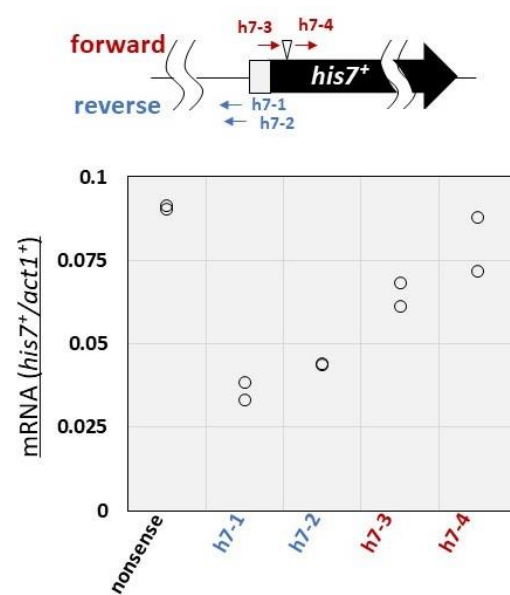**C**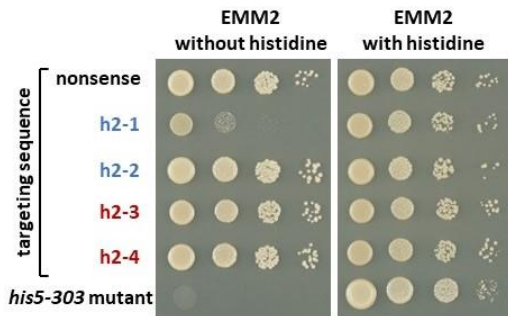**D**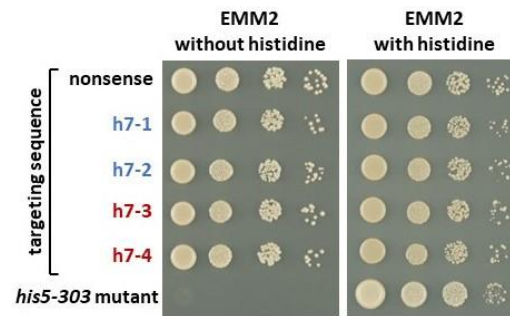

**Figure S3. Transcriptional repression of the *his2<sup>+</sup>* or *his7<sup>+</sup>* gene by dCas9-mediated CRISPRi.**

Quantification of *his2<sup>+</sup>* (A) or *his7<sup>+</sup>* (B) mRNA by RT-qPCR with sgRNAs that have the indicated targeting sequence. (A, B) Results of two biological replicates are shown. Diagrams are labeled as Figure 2A. A white triangle indicates 100 bp from the TSS. (C, D) Serial dilution (10-fold) spot test growth assays of fission yeast cells bearing pSPdCas9 plasmids with the indicated targeting sequences on differentially supplemented media as shown. The *his5-303* mutant (strain sp152, *h<sup>+</sup> his5-303*) is defective in histidine biogenesis. Cells were spotted after induction of CRISPRi (see the Materials and Methods section for details).
