# Supplementary material
Source: publisher figshare collection journal article supplement (https://gsajournals.figshare.com/articles/dataset/_/14038109)
Supplement: Supplementary file 1 [file 1]

## Sheet: Sheet1
ID	purpose	targeting sequence ID	sequence (5'-)
KI864	pSPdCas9 construction (D10A mutaion)	NA	GCAGCCGACAAGAAGTACAGCATCGGCCTGGCAATCGGCACCAACTCTGTG
KI865	pSPdCas9 construction (H840A mutaion)	NA	GTCGTCCTTCAGAAAGCTCTGAGGCACGATTGCGTCCACATCGTAGTCGGA
KI866	pSPdCas9 construction (vector region)	NA	ATCGTGCCTCAGAGCTTTCTGAA
KI867	pSPdCas9 construction (vector region)	NA	CAGGCCGATGCTGTACTTCTTGT
KI1020	targeting sequence (ade6)	a1	cacc-GAGGTAAACGAAATCCAGCC
KI1021	targeting sequence (ade6)	a1	aaac-GGCTGGATTTCGTTTACCTC
KI1022	targeting sequence (ade6)	a2	cacc-AAGTTGCATTTCACAATGCT
KI1023	targeting sequence (ade6)	a2	aaac-AGCATTGTGAAATGCAACTT
KI1026	targeting sequence (ade6)	a3	cacc-GGCAGCTCAGCTTAATGAGA
KI1027	targeting sequence (ade6)	a3	aaac-TCTCATTAAGCTGAGCTGCC
KI895	targeting sequence (ade6)	a4	cacc-CTCATTAAGCTGAGCTGCCA
KI896	targeting sequence (ade6)	a4	aaac-TGGCAGCTCAGCTTAATGAG
KI1024	targeting sequence (ade6)	a5	cacc-GATGAAGTATGTATATACCT
KI1025	targeting sequence (ade6)	a5	aaac-AGGTATATACATACTTCATC
KI897	targeting sequence (ade6)	a6	cacc-AAACAGGTTGTAGGGATCCT
KI898	targeting sequence (ade6)	a6	aaac-AGGATCCCTACAACCTGTTT
KI1040	targeting sequence (ade6)	a7	cacc-ATTGGGCCGAATGATGGTAG
KI1041	targeting sequence (ade6)	a7	aaac-CTACCATCATTCGGCCCAAT
KI1042	targeting sequence (ade6)	a8	cacc-GGGCTGCCTCTACCATCATT
KI1043	targeting sequence (ade6)	a8	aaac-AATGATGGTAGAGGCAGCCC
KI1044	targeting sequence (ade6)	a9	cacc-TGCATTTGATGTTTAAGCGA
KI1045	targeting sequence (ade6)	a9	aaac-TCGCTTAAACATCAAATGCA
KI1046	targeting sequence (ade6)	a10	cacc-AAACATCAAATGCATCATCT
KI1047	targeting sequence (ade6)	a10	aaac-AGATGATGCATTTGATGTTT
KI1048	targeting sequence (ade6)	a11	cacc-CCTGCCAAACAAATTGATGG
KI1049	targeting sequence (ade6)	a11	aaac-CCATCAATTTGTTTGGCAGG
KI1050	targeting sequence (ade6)	a12	cacc-CCTCCATCAATTTGTTTGGC
KI1051	targeting sequence (ade6)	a12	aaac-GCCAAACAAATTGATGGAGG
KI1052	targeting sequence (ade6)	a13	cacc-GACAGTTCAACAATTGCATC
KI1053	targeting sequence (ade6)	a13	aaac-GATGCAATTGTTGAACTGTC
KI1054	targeting sequence (ade6)	a14	cacc-GCATATTAACACTGATGCCT
KI1055	targeting sequence (ade6)	a14	aaac-AGGCATCAGTGTTAATATGC
KI1056	targeting sequence (ade6)	a15	cacc-TGAATGCATCGCAGAGTTGC
KI1057	targeting sequence (ade6)	a15	aaac-GCAACTCTGCGATGCATTCA
KI1058	targeting sequence (ade6)	a16	cacc-TCTTCAAAAACAGCATTTAC
KI1059	targeting sequence (ade6)	a16	aaac-GTAAATGCTGTTTTTGAAGA
KI899	targeting sequence (ade6)	a17	cacc-ACATTGGCTTACGACGGTCG
KI900	targeting sequence (ade6)	a17	aaac-CGACCGTCGTAAGCCAATGT
KI1060	targeting sequence (ura4)	u1	cacc-ATCTTGTGTAATTTTTGGCA
KI1061	targeting sequence (ura4)	u1	aaac-TGCCAAAAATTACACAAGAT
KI1062	targeting sequence (ura4)	u2	cacc-AATTTAAAGCAAGGGCATTA
KI1063	targeting sequence (ura4)	u2	aaac-TAATGCCCTTGCTTTAAATT
KI1064	targeting sequence (ura4)	u3	cacc-ATATTTTAGATAGTTCTGTG
KI1065	targeting sequence (ura4)	u3	aaac-CACAGAACTATCTAAAATAT
KI1066	targeting sequence (ura4)	u4	cacc-GAAGCATAGTTAAACTGGGA
KI1067	targeting sequence (ura4)	u4	aaac-TCCCAGTTTAACTATGCTTC
KI1068	targeting sequence (ura4)	u5	cacc-CCAGTTTAACTATGCTTCGT
KI1069	targeting sequence (ura4)	u5	aaac-ACGAAGCATAGTTAAACTGG
KI1070	targeting sequence (ura4)	u6	cacc-CCGACGAAGCATAGTTAAAC
KI1071	targeting sequence (ura4)	u6	aaac-GTTTAACTATGCTTCGTCGG
KI1072	targeting sequence (ura4)	u7	cacc-AGGTTCTTGGTAGGACAATA
KI1073	targeting sequence (ura4)	u7	aaac-TATTGTCCTACCAAGAACCT
KI1074	targeting sequence (ura4)	u8	cacc-CCAAGAACCTCTTTTTTGCT
KI1075	targeting sequence (ura4)	u8	aaac-AGCAAAAAAGAGGTTCTTGG
KI1076	targeting sequence (ura4)	u9	cacc-CCAAGCAAAAAAGAGGTTCT
KI1077	targeting sequence (ura4)	u9	aaac-AGAACCTCTTTTTTGCTTGG
KI1078	targeting sequence (ura4)	u10	cacc-TTTCGATCCAAGCAAAAAAG
KI1079	targeting sequence (ura4)	u10	aaac-CTTTTTTGCTTGGATCGAAA
KI1080	targeting sequence (ura4)	u11	cacc-AAGGTTTAAAAGCAAAGTTA
KI1081	targeting sequence (ura4)	u11	aaac-TAACTTTGCTTTTAAACCTT
KI1082	targeting sequence (ura4)	u12	cacc-AAGCTATTCAGCTAGAGCTG
KI1083	targeting sequence (ura4)	u12	aaac-CAGCTCTAGCTGAATAGCTT
KI1084	targeting sequence (ura4)	u13	cacc-TCCCATTGCCAAGGAATTGT
KI1085	targeting sequence (ura4)	u13	aaac-ACAATTCCTTGGCAATGGGA
KI1086	targeting sequence (ura4)	u14	cacc-GCCAACAATTCCTTGGCAAT
KI1087	targeting sequence (ura4)	u14	aaac-ATTGCCAAGGAATTGTTGGC
KI1088	targeting sequence (ura4)	u15	cacc-GCAAAGCAACTTGTCAGTCG
KI1089	targeting sequence (ura4)	u15	aaac-CGACTGACAAGTTGCTTTGC
KI1090	targeting sequence (ura4)	u16	cacc-ATCTACCAATTCTAAGATTT
KI1091	targeting sequence (ura4)	u16	aaac-AAATCTTAGAATTGGTAGAT
KI1092	targeting sequence (ura4)	u17	cacc-TTAGAATTGGTAGATAAAAT
KI1093	targeting sequence (ura4)	u17	aaac-ATTTTATCTACCAATTCTAA
KI1094	targeting sequence (ura4)	u18	cacc-TGTCTTGATAACACAGACAT
KI1095	targeting sequence (ura4)	u18	aaac-ATGTCTGTGTTATCAAGACA
KI1096	targeting sequence (ura4)	u19	cacc-GACACATATTGACGTTGTCG
KI1097	targeting sequence (ura4)	u19	aaac-CGACAACGTCAATATGTGTC
KI1098	targeting sequence (ura4)	u20	cacc-GTAGAAAAACTGGTGGCCTT
KI1099	targeting sequence (ura4)	u20	aaac-AAGGCCACCAGTTTTTCTAC
KI1100	targeting sequence (ura4)	u21	cacc-AAAACGATGCTTTTTACCTA
KI1101	targeting sequence (ura4)	u21	aaac-TAGGTAAAAAGCATCGTTTT
KI1102	targeting sequence (ura4)	u22	cacc-GTCAAGCTACAATATGCATC
KI1103	targeting sequence (ura4)	u22	aaac-GATGCATATTGTAGCTTGAC
KI1129	targeting sequence (his2)	h2-1	cacc-TGGCTAAGGAATGGCTGGAT
KI1130	targeting sequence (his2)	h2-1	aaac-ATCCAGCCATTCCTTAGCCA
KI1131	targeting sequence (his2)	h2-2	cacc-AATGTTGGCTAAGGAATGGC
KI1132	targeting sequence (his2)	h2-2	aaac-GCCATTCCTTAGCCAACATT
KI1133	targeting sequence (his2)	h2-3	cacc-TTTAATTTACTTAATAATGC
KI1134	targeting sequence (his2)	h2-3	aaac-GCATTATTAAGTAAATTAAA
KI1135	targeting sequence (his2)	h2-4	cacc-AATGCCGGAATACGAGATTC
KI1136	targeting sequence (his2)	h2-4	aaac-GAATCTCGTATTCCGGCATT
KI1145	targeting sequence (his7)	h7-1	cacc-TAAATCACCTTTAGGTAACC
KI1146	targeting sequence (his7)	h7-1	aaac-GGTTACCTAAAGGTGATTTA
KI1147	targeting sequence (his7)	h7-2	cacc-AACAATCATAAATCACCTTT
KI1148	targeting sequence (his7)	h7-2	aaac-AAAGGTGATTTATGATTGTT
KI1149	targeting sequence (his7)	h7-3	cacc-AGGGGTATTTGACTTACAAA
KI1150	targeting sequence (his7)	h7-3	aaac-TTTGTAAGTCAAATACCCCT
KI1151	targeting sequence (his7)	h7-4	cacc-AGTGATGCTTCTGAAGAGTT
KI1152	targeting sequence (his7)	h7-4	aaac-AACTCTTCAGAAGCATCACT
KI915	qPCR (ade6)	NA	GGCGCTGGTATATATGGTGTAG
KI916	qPCR (ade6)	NA	ATGGTGTAGTGACCTGAATTGT
KI1034	qPCR (ura4)	NA	CTCTTTGGCTACTGGTTCCTAC
KI1035	qPCR (ura4)	NA	GGAAATCGACGACCAGCTATAA
KI1163	qPCR (his2)	NA	CGGGTACGCCTCTTCTTATTC
KI1164	qPCR (his2)	NA	AACCGCTGGATTCCTTCTTC
KI1157	qPCR (his7)	NA	GGTTCGGGTGTTAGCCTTAAT
KI1158	qPCR (his7)	NA	GCCACTCCTCCTTTGTCTTT
KI1125	qPCR (dCas9)	NA	TACAACAAGCACCGGGATAAG
KI1126	qPCR (dCas9)	NA	GTCGATGGTGGTGTCAAAGTA
act1-Fw	qPCR (act1)	NA	CTTTCTACAACGAGCTTCGTGTTG
act1-Rv	qPCR (act1)	NA	GAGTCATCTTCTCACGGTTGGAT
KI907	insert check PCR for targeting sequence cloning	NA	AGTCAGCAAGGAGCGTAGAAC
KI908	insert check PCR for targeting sequence cloning	NA	ACCGTAAAGGCACTTCAACC
KI909	insert check PCR for targeting sequence cloning	NA	ACCGGGTCTTCGAGAAGACCT
KI910	insert check PCR for targeting sequence cloning	NA	AGGTCTTCTCGAAGACCCGGT
